# Supplementary material for: Comparative secretome analysis of Streptomyces scabiei during growth in the presence or absence of potato suberin
Source: PubMed Central journal article supplement (PMC4098958; doi:10.1186/1477-5956-12-35), 2014-06-25
Supplement: 1477-5956-12-35-S1.pdf [file 1477-5956-12-35-S1.pdf]

**Additional file 1: Table S1.** Proteins produced by *Streptomyces scabiei* found in both casein-suberin and casein media.

| Protein assignment <sup>a</sup> | Gene assignment        | Putative function                                       | Abundance (spectrum count/MW <sup>b</sup> ) in casein-suberin medium |             |             | Abundance (spectrum count/MW <sup>b</sup> ) in casein medium |             |             |
|---------------------------------|------------------------|---------------------------------------------------------|----------------------------------------------------------------------|-------------|-------------|--------------------------------------------------------------|-------------|-------------|
|                                 |                        |                                                         | Day 1                                                                | Day 3       | Day 5       | Day 1                                                        | Day 3       | Day 5       |
| C9ZBE2                          | SCAB_0601              | Secreted protein                                        | nd <sup>c</sup>                                                      | 0.09 ± 0.05 | 0.06 ± 0.03 | 0.01 ± 0.01                                                  | 0.03 ± 0.03 | 0.02 ± 0.01 |
| C9ZBE8                          | SCAB_0651              | Secreted protein                                        | nd                                                                   | 0.02 ± 0.03 | 0.03 ± 0.04 | nd                                                           | 0.05 ± 0.05 | 0.04 ± 0.05 |
| C9ZEJ5                          | SCAB_2381              | Secreted protein                                        | 0.11 ± 0.00                                                          | 0.04 ± 0.06 | nd          | 0.04 ± 0.06                                                  | nd          | nd          |
| C9ZG64                          | SCAB_2941              | Secreted protein                                        | 0.19 ± 0.16                                                          | 0.76 ± 0.18 | 0.55 ± 0.17 | 0.13 ± 0.07                                                  | nd          | nd          |
| C9ZG71                          | SCAB_3021              | Esterase A                                              | 0.14 ± 0.20                                                          | 0.58 ± 0.31 | 0.23 ± 0.12 | 0.23 ± 0.10                                                  | 0.17 ± 0.19 | 0.21 ± 0.17 |
| C9ZG76                          | SCAB_3071 <sup>d</sup> | Serine/threonine protein kinase                         | 0.08 ± 0.08                                                          | 0.22 ± 0.08 | 0.11 ± 0.05 | 0.01 ± 0.02                                                  | nd          | nd          |
| C9ZG88                          | SCAB_3201              | Secreted protein                                        | 0.08 ± 0.07                                                          | nd          | nd          | 0.03 ± 0.05                                                  | nd          | nd          |
| C9YUA5                          | SCAB_4761              | Secreted protein                                        | 0.33 ± 0.23                                                          | 2.47 ± 1.41 | 1.18 ± 0.42 | 0.25 ± 0.10                                                  | 0.07 ± 0.08 | 0.02 ± 0.03 |
| C9YUC2                          | SCAB_4931              | Secreted protein                                        | 0.01 ± 0.02                                                          | 0.03 ± 0.03 | 0.02 ± 0.04 | 0.03 ± 0.03                                                  | nd          | 0.01 ± 0.01 |
| C9YUG2                          | SCAB_5351              | ABC-type sugar transport protein                        | 0.19 ± 0.10                                                          | 0.37 ± 0.05 | 0.29 ± 0.08 | 0.12 ± 0.03                                                  | 0.37 ± 0.04 | 0.45 ± 0.15 |
| C9YVL6                          | SCAB_5671              | Secreted protein                                        | 0.07 ± 0.07                                                          | 0.37 ± 0.14 | 0.10 ± 0.12 | 0.23 ± 0.11                                                  | 0.26 ± 0.24 | 0.22 ± 0.22 |
| C9YX78                          | SCAB_6661              | Exported protein                                        | 0.20 ± 0.13                                                          | 0.42 ± 0.08 | 0.33 ± 0.13 | 0.29 ± 0.08                                                  | 0.01 ± 0.03 | nd          |
| C9YXA8                          | SCAB_6971              | Glycine betaine-binding Lipoprotein, ABC-type transport | nd                                                                   | 0.24 ± 0.22 | 0.08 ± 0.12 | nd                                                           | 0.12 ± 0.10 | 0.30 ± 0.24 |
| C9YYN8                          | SCAB_7551              | Secreted protein                                        | 0.16 ± 0.04                                                          | 0.76 ± 0.10 | 0.69 ± 0.30 | 0.40 ± 0.07                                                  | 0.39 ± 0.15 | 0.28 ± 0.18 |
| C9YYQ6                          | SCAB_7741              | Membrane protein                                        | 0.20 ± 0.05                                                          | 0.26 ± 0.07 | 0.19 ± 0.07 | 0.13 ± 0.01                                                  | 0.02 ± 0.02 | nd          |
| C9Z074                          | SCAB_8221              | Uncharacterized protein                                 | 0.00 ± 0.01                                                          | 0.07 ± 0.07 | 0.15 ± 0.11 | 0.23 ± 0.25                                                  | 0.01 ± 0.01 | 0.01 ± 0.02 |
| C9Z082                          | SCAB_8301              | Secreted protease                                       | 0.07 ± 0.07                                                          | 0.04 ± 0.01 | nd          | 0.02 ± 0.02                                                  | nd          | nd          |
| C9Z0C3                          | SCAB_8741              | Solute-binding lipoprotein                              | 0.08 ± 0.00                                                          | 0.34 ± 0.12 | 0.11 ± 0.04 | nd                                                           | 0.07 ± 0.05 | 0.07 ± 0.06 |
| C9Z0C9                          | SCAB_8801              | Subtilase-type protease inhibitor                       | 2.20 ± 0.52                                                          | 4.00 ± 0.97 | 3.76 ± 0.67 | 0.62 ± 0.30                                                  | 0.06 ± 0.09 | nd          |
| C9Z3C3                          | SCAB_10031             | Secreted protein                                        | 0.02 ± 0.04                                                          | 0.10 ± 0.04 | 0.02 ± 0.04 | 0.04 ± 0.07                                                  | nd          | nd          |

|        |                         |                                                               |             |             |             |             |             |             |
|--------|-------------------------|---------------------------------------------------------------|-------------|-------------|-------------|-------------|-------------|-------------|
| C9Z516 | SCAB_11521              | Lipoprotein                                                   | 0.99 ± 0.19 | 1.29 ± 0.33 | 0.89 ± 0.18 | 0.20 ± 0.06 | nd          | nd          |
| C9Z6J9 | SCAB_12241              | Secreted protein                                              | 0.03 ± 0.06 | 0.35 ± 0.30 | 0.03 ± 0.03 | 0.05 ± 0.05 | nd          | nd          |
| C9Z6Q3 | SCAB_12851              | Secreted peptidase                                            | 0.17 ± 0.08 | 0.44 ± 0.21 | 0.14 ± 0.09 | 0.01 ± 0.02 | nd          | nd          |
| C9ZD42 | SCAB_16351              | Secreted protein                                              | 0.02 ± 0.03 | 0.34 ± 0.14 | 0.08 ± 0.03 | 0.02 ± 0.03 | 0.01 ± 0.02 | 0.01 ± 0.02 |
| C9ZD55 | SCAB_16481              | Membrane protein                                              | 0.16 ± 0.15 | 0.46 ± 0.15 | 0.26 ± 0.08 | 0.20 ± 0.07 | 0.27 ± 0.06 | 0.17 ± 0.07 |
| C9ZGH2 | SCAB_18141 <sup>d</sup> | Secreted protein                                              | 0.14 ± 0.07 | 0.44 ± 0.06 | 0.20 ± 0.09 | 0.27 ± 0.12 | 0.27 ± 0.01 | 0.25 ± 0.07 |
| C9YT45 | SCAB_19371 <sup>d</sup> | Cellulose-binding protein                                     | 0.06 ± 0.04 | 0.09 ± 0.02 | 0.07 ± 0.02 | 0.04 ± 0.00 | nd          | nd          |
| C9YT47 | SCAB_19401              | Secreted protein                                              | nd          | 0.12 ± 0.15 | 0.10 ± 0.04 | 0.05 ± 0.08 | nd          | nd          |
| C9YT56 | SCAB_19491              | Exported protein                                              | 0.06 ± 0.10 | 0.12 ± 0.03 | 0.02 ± 0.04 | 0.14 ± 0.05 | nd          | nd          |
| C9YT70 | SCAB_19641              | Uncharacterized protein                                       | 0.02 ± 0.04 | nd          | nd          | 0.02 ± 0.02 | nd          | nd          |
| C9YUJ5 | SCAB_19751              | Secreted protein                                              | 0.77 ± 0.31 | 0.28 ± 0.04 | 0.06 ± 0.04 | 0.07 ± 0.08 | nd          | nd          |
| C9YUK3 | SCAB_19841              | Aliphatic sulfonate ABC transporter substrate-binding protein | 0.32 ± 0.14 | 0.49 ± 0.14 | 0.33 ± 0.12 | 0.20 ± 0.06 | 0.79 ± 0.27 | 0.80 ± 0.33 |
| C9YVX8 | SCAB_21021              | Xylose ABC transporter substrate-binding protein              | 0.12 ± 0.13 | 0.84 ± 0.27 | 0.63 ± 0.12 | 0.06 ± 0.04 | 0.05 ± 0.07 | 0.10 ± 0.07 |
| C9YVY6 | SCAB_21101 <sup>d</sup> | Aconitate hydratase                                           | 0.05 ± 0.04 | nd          | nd          | 0.02 ± 0.02 | nd          | 0.01 ± 0.02 |
| C9YVV4 | SCAB_22951              | Acetyl-xylan esterase                                         | 0.04 ± 0.04 | 0.43 ± 0.19 | 0.25 ± 0.16 | 0.11 ± 0.07 | 0.20 ± 0.16 | 0.17 ± 0.15 |
| C9Z0L9 | SCAB_24621              | Uncharacterized protein                                       | 0.07 ± 0.08 | 0.23 ± 0.08 | 0.09 ± 0.08 | 0.21 ± 0.00 | 0.36 ± 0.09 | 0.34 ± 0.15 |
| C9Z204 | SCAB_24891              | Glutamate uptake system binding subunit                       | 0.13 ± 0.12 | 0.89 ± 0.31 | 0.74 ± 0.13 | 0.40 ± 0.16 | 1.26 ± 0.21 | 1.20 ± 0.46 |
| C9Z3S4 | SCAB_26361              | Membrane-anchored protein                                     | 0.19 ± 0.17 | 0.33 ± 0.10 | 0.26 ± 0.08 | 0.11 ± 0.07 | nd          | nd          |
| C9Z578 | SCAB_26841              | Serine protease                                               | nd          | 0.38 ± 0.18 | 0.14 ± 0.09 | 0.19 ± 0.10 | 0.22 ± 0.24 | 0.14 ± 0.11 |
| C9Z5D4 | SCAB_27411              | Oligopeptide-binding transport system protein                 | 0.01 ± 0.02 | 0.27 ± 0.22 | 0.25 ± 0.08 | nd          | 0.14 ± 0.16 | 0.07 ± 0.09 |
| C9Z6U2 | SCAB_27811              | Uncharacterized protein                                       | 0.50 ± 0.19 | 0.05 ± 0.02 | 0.01 ± 0.01 | 0.01 ± 0.01 | nd          | nd          |
| C9Z6Y6 | SCAB_28271              | Cholesterol esterase                                          | 0.29 ± 0.13 | 0.68 ± 0.22 | 0.35 ± 0.17 | 0.72 ± 0.22 | 0.93 ± 0.40 | 0.69 ± 0.29 |
| C9Z8E5 | SCAB_28731              | Chitinase C                                                   | 0.04 ± 0.01 | 0.30 ± 0.11 | 0.27 ± 0.16 | 0.06 ± 0.02 | 0.29 ± 0.08 | 0.20 ± 0.08 |

|        |                         |                                                                  |             |             |             |             |             |             |
|--------|-------------------------|------------------------------------------------------------------|-------------|-------------|-------------|-------------|-------------|-------------|
| C9Z8G4 | SCAB_28921              | secreted serine-type Endopeptidase                               | 0.01 ± 0.01 | nd          | nd          | nd          | 0.06 ± 0.06 | 0.09 ± 0.08 |
| C9Z8L7 | SCAB_29411              | Membrane protein                                                 | 0.02 ± 0.03 | nd          | nd          | nd          | 0.07 ± 0.09 | 0.04 ± 0.04 |
| C9ZAD0 | SCAB_30191              | Extracellular sugar-binding protein                              | nd          | 0.19 ± 0.13 | 0.10 ± 0.13 | nd          | 0.01 ± 0.01 | nd          |
| C9ZAF2 | SCAB_30421 <sup>d</sup> | 3-phosphoshikimate 1-carboxyvinyltransferase                     | 0.01 ± 0.01 | nd          | nd          | nd          | 0.01 ± 0.03 | 0.01 ± 0.02 |
| C9ZBV7 | SCAB_31131              | Protease                                                         | 0.06 ± 0.05 | 0.05 ± 0.01 | 0.03 ± 0.02 | 0.01 ± 0.01 | nd          | nd          |
| C9ZD97 | SCAB_31531              | BldKB-like transport system extracellular solute-binding protein | 0.01 ± 0.01 | nd          | nd          | 0.01 ± 0.02 | nd          | 0.05 ± 0.04 |
| C9ZF82 | SCAB_33691              | Transglycosylase domain-containing protein                       | 0.51 ± 0.15 | 1.06 ± 0.57 | 0.81 ± 0.28 | 0.09 ± 0.04 | nd          | nd          |
| C9ZGN8 | SCAB_33851              | Chinitase A                                                      | 0.07 ± 0.06 | 0.13 ± 0.06 | 0.12 ± 0.03 | 0.03 ± 0.01 | 0.05 ± 0.05 | 0.04 ± 0.02 |
| C9ZGS4 | SCAB_34211              | Uncharacterized protein                                          | 0.15 ± 0.07 | 0.22 ± 0.05 | 0.06 ± 0.02 | 0.16 ± 0.05 | 0.08 ± 0.10 | 0.09 ± 0.09 |
| C9ZGU9 | SCAB_34471              | Lipoprotein                                                      | 0.37 ± 0.18 | 0.22 ± 0.09 | 0.02 ± 0.02 | 0.03 ± 0.03 | nd          | nd          |
| C9YT92 | SCAB_34981              | Lipoprotein                                                      | 0.05 ± 0.04 | 0.68 ± 0.47 | 0.50 ± 0.36 | 0.14 ± 0.05 | 0.86 ± 0.27 | 0.81 ± 0.50 |
| C9YTC3 | SCAB_35291 <sup>d</sup> | Succinate dehydrogenase flavoprotein subunit                     | 0.01 ± 0.02 | 0.03 ± 0.03 | 0.02 ± 0.02 | 0.01 ± 0.01 | 0.01 ± 0.01 | nd          |
| C9YTD0 | SCAB_35361              | Secreted protein                                                 | 0.83 ± 0.52 | 0.94 ± 0.29 | 0.38 ± 0.10 | 0.46 ± 0.16 | 1.30 ± 0.44 | 0.86 ± 0.24 |
| C9YTG2 | SCAB_35681 <sup>d</sup> | Malate dehydrogenase                                             | 0.22 ± 0.19 | 0.13 ± 0.12 | 0.03 ± 0.03 | 0.30 ± 0.11 | 0.04 ± 0.03 | 0.01 ± 0.01 |
| C9YUX5 | SCAB_36201 <sup>d</sup> | IMP dehydrogenase/ GMP reductase (RefSeq)                        | 0.02 ± 0.03 | 0.01 ± 0.01 | 0.01 ± 0.01 | 0.07 ± 0.03 | nd          | nd          |
| C9YW51 | SCAB_36671 <sup>d</sup> | DNA-directed RNA polymerase subunit alpha                        | 0.02 ± 0.03 | nd          | nd          | 0.01 ± 0.02 | nd          | nd          |
| C9YW53 | SCAB_36691 <sup>d</sup> | 30S ribosomal protein S13                                        | 0.05 ± 0.08 | nd          | nd          | 0.10 ± 0.04 | nd          | nd          |
| C9YW92 | SCAB_37091 <sup>d</sup> | Elongation factor Tu 1                                           | 0.25 ± 0.22 | 0.03 ± 0.03 | nd          | 0.02 ± 0.04 | nd          | nd          |
| C9YWB0 | SCAB_37271 <sup>d</sup> | Aspartate aminotransferase                                       | 0.11 ± 0.10 | 0.02 ± 0.03 | nd          | 0.03 ± 0.05 | nd          | nd          |
| C9YWC0 | SCAB_37371 <sup>d</sup> | Hypothetical protein                                             | 0.02 ± 0.03 | 0.02 ± 0.03 | nd          | 0.04 ± 0.06 | nd          | nd          |

|        |                         |                                     |             |             |             |             |             |             |  |
|--------|-------------------------|-------------------------------------|-------------|-------------|-------------|-------------|-------------|-------------|--|
| (+1)   |                         |                                     |             |             |             |             |             |             |  |
| C9YXR8 | SCAB_37611              | Aminopeptidase                      | 0.18 ± 0.08 | 0.71 ± 0.18 | 0.55 ± 0.27 | 0.71 ± 0.21 | 1.26 ± 0.53 | 1.12 ± 0.72 |  |
| C9YXT6 | SCAB_37811              | Membrane protein                    | 0.38 ± 0.11 | 0.44 ± 0.05 | 0.11 ± 0.08 | 0.01 ± 0.01 | nd          | nd          |  |
| C9YXX5 | SCAB_38231              | Cold shock protein                  | nd          | 0.48 ± 0.30 | 0.38 ± 0.08 | 0.14 ± 0.14 | 0.02 ± 0.06 | nd          |  |
| C9YZA8 | SCAB_38901              | Membrane protein                    | 0.35 ± 0.06 | 1.41 ± 0.12 | 0.89 ± 0.26 | 0.10 ± 0.07 | nd          | 0.03 ± 0.03 |  |
| C9YZB9 | SCAB_39021              | Uncharacterized protein             | 0.03 ± 0.04 | 0.21 ± 0.06 | 0.15 ± 0.08 | 0.09 ± 0.08 | nd          | nd          |  |
| C9YZD0 | SCAB_39131              | Membrane protein                    | 0.32 ± 0.13 | 0.68 ± 0.05 | 0.51 ± 0.21 | 0.01 ± 0.01 | nd          | nd          |  |
| C9Z0Q1 | SCAB_39341 <sup>d</sup> | Uncharacterized protein             | 0.07 ± 0.05 | 0.09 ± 0.05 | 0.03 ± 0.02 | 0.04 ± 0.02 | nd          | nd          |  |
| C9Z0X0 | SCAB_40041              | Lipoprotein                         | 0.24 ± 0.14 | 0.70 ± 0.12 | 0.69 ± 0.08 | 0.41 ± 0.08 | 0.63 ± 0.19 | 0.24 ± 0.17 |  |
| C9Z5G9 | SCAB_42541 <sup>d</sup> | Chaperone protein DnaK 2            | 0.08 ± 0.08 | 0.04 ± 0.07 | nd          | 0.09 ± 0.06 | 0.08 ± 0.05 | nd          |  |
| C9Z5M7 | SCAB_43121              | Uncharacterized protein             | 0.04 ± 0.02 | 0.13 ± 0.05 | 0.09 ± 0.03 | 0.03 ± 0.04 | 0.02 ± 0.04 | 0.01 ± 0.02 |  |
| C9Z722 | SCAB_43501              | Carboxypeptidase                    | 0.31 ± 0.11 | 0.24 ± 0.11 | 0.15 ± 0.06 | 0.51 ± 0.05 | 0.15 ± 0.15 | 0.07 ± 0.08 |  |
| C9Z759 | SCAB_43891              | Secreted protein                    | 0.16 ± 0.09 | 0.43 ± 0.09 | 0.43 ± 0.24 | 0.37 ± 0.09 | 0.06 ± 0.06 | 0.02 ± 0.05 |  |
| C9Z760 | SCAB_43901              | Secreted hydrolase                  | 0.79 ± 0.34 | 0.74 ± 0.25 | 0.48 ± 0.11 | 1.25 ± 0.04 | 1.66 ± 0.53 | 1.38 ± 0.57 |  |
| C9Z765 | SCAB_43951              | Uncharacterized protein             | 0.13 ± 0.19 | 0.42 ± 0.15 | 0.23 ± 0.08 | 0.13 ± 0.10 | 0.13 ± 0.18 | 0.03 ± 0.06 |  |
| C9Z770 | SCAB_44001              | Secreted protein                    | 0.12 ± 0.16 | 0.04 ± 0.02 | 0.02 ± 0.03 | nd          | 0.06 ± 0.07 | 0.01 ± 0.01 |  |
| C9Z8N7 | SCAB_44501              | Membrane protein                    | nd          | 0.24 ± 0.19 | 0.03 ± 0.03 | 0.08 ± 0.07 | nd          | nd          |  |
| C9Z8P9 | SCAB_44621              | Secreted protein                    | 0.11 ± 0.07 | 0.51 ± 0.07 | 0.32 ± 0.15 | 0.22 ± 0.15 | 0.04 ± 0.05 | nd          |  |
| C9Z8Q6 | SCAB_44691              | Secreted protein                    | 0.22 ± 0.07 | 0.12 ± 0.07 | 0.01 ± 0.02 | 0.02 ± 0.04 | nd          | nd          |  |
| C9ZAH6 | SCAB_45481              | Secreted protein                    | 0.05 ± 0.05 | 0.23 ± 0.08 | 0.18 ± 0.08 | 0.04 ± 0.06 | 0.01 ± 0.02 | nd          |  |
| (+4)   |                         |                                     |             |             |             |             |             |             |  |
| C9ZAJ2 | SCAB_45651 <sup>d</sup> | Peptidyl-prolyl cis-trans isomerase | 0.16 ± 0.19 | 0.33 ± 0.21 | 0.19 ± 0.13 | 0.54 ± 0.11 | 0.03 ± 0.04 | 0.01 ± 0.02 |  |
| C9ZAL8 | SCAB_45931 <sup>d</sup> | Thioredoxin reductase               | 0.04 ± 0.04 | 0.02 ± 0.03 | 0.03 ± 0.03 | 0.09 ± 0.06 | 0.01 ± 0.02 | 0.01 ± 0.02 |  |
| (+15)  |                         |                                     |             |             |             |             |             |             |  |
| C9ZAM8 | SCAB_46031              | Secreted transglycosylase           | 0.17 ± 0.07 | 0.02 ± 0.01 | nd          | 0.01 ± 0.01 | nd          | nd          |  |
| C9ZC23 | SCAB_46591              | Copper-binding protein              | nd          | 0.06 ± 0.01 | 0.02 ± 0.02 | 0.00 ± 0.01 | 0.01 ± 0.02 | 0.00 ± 0.01 |  |
| C9ZC25 | SCAB_46611              | Secreted protein                    | 0.25 ± 0.13 | 1.14 ± 0.44 | 0.79 ± 0.31 | 0.01 ± 0.02 | nd          | nd          |  |

|        |                         |                                            |             |             |             |             |             |             |
|--------|-------------------------|--------------------------------------------|-------------|-------------|-------------|-------------|-------------|-------------|
| C9ZFG9 | SCAB_49021              | Peptidase                                  | 0.16 ± 0.02 | 0.38 ± 0.06 | 0.03 ± 0.03 | 0.01 ± 0.02 | nd          | nd          |
| C9ZFI5 | SCAB_49311              | High-affinity phosphate-binding protein    | 1.15 ± 0.38 | 2.21 ± 0.45 | 1.86 ± 0.50 | 0.75 ± 0.16 | 1.05 ± 0.36 | 0.97 ± 0.45 |
| C9ZH11 | SCAB_49881              | Secreted protein                           | nd          | 0.10 ± 0.05 | 0.04 ± 0.01 | 0.01 ± 0.01 | nd          | nd          |
| C9ZH47 | SCAB_50261 <sup>d</sup> | TerD-like stress protein                   | 0.27 ± 0.14 | 0.65 ± 0.22 | 0.52 ± 0.06 | 0.43 ± 0.12 | 0.63 ± 0.23 | 0.59 ± 0.20 |
| C9YV41 | SCAB_52001              | Secreted protein                           | 1.13 ± 0.57 | 1.63 ± 0.32 | 1.27 ± 0.52 | 0.69 ± 0.14 | 0.90 ± 0.19 | 0.76 ± 0.33 |
| C9YV96 | SCAB_52561 <sup>d</sup> | Membrane protein                           | 0.15 ± 0.05 | 0.07 ± 0.08 | nd          | 0.03 ± 0.05 | nd          | nd          |
| C9YWE9 | SCAB_53001              | Lipoprotein                                | 0.46 ± 0.20 | 0.11 ± 0.05 | 0.09 ± 0.04 | 0.02 ± 0.03 | nd          | nd          |
| C9YWG0 | SCAB_53111              | Secreted penicillin acylase                | 0.04 ± 0.04 | 0.02 ± 0.02 | nd          | 0.01 ± 0.01 | 0.00 ± 0.01 | nd          |
| C9YXZ5 | SCAB_53981              | Secreted peptidase                         | nd          | 0.03 ± 0.02 | 0.02 ± 0.02 | 0.04 ± 0.02 | 0.06 ± 0.03 | 0.07 ± 0.03 |
| C9YY35 | SCAB_54421              | Transglycosylase domain-containing protein | 0.54 ± 0.19 | 0.32 ± 0.09 | 0.15 ± 0.13 | 0.06 ± 0.03 | nd          | nd          |
| C9YY36 | SCAB_54431              | Cell wall catabolism protein               | 0.22 ± 0.10 | 0.29 ± 0.08 | 0.24 ± 0.09 | 0.03 ± 0.05 | nd          | nd          |
| C9YY37 | SCAB_54441 <sup>d</sup> | Enolase                                    | 0.04 ± 0.06 | nd          | 0.01 ± 0.01 | nd          | 0.01 ± 0.02 | 0.03 ± 0.03 |
| C9YZE4 | SCAB_54701 <sup>d</sup> | Urocanate hydratase                        | 0.01 ± 0.02 | 0.06 ± 0.06 | 0.10 ± 0.02 | 0.01 ± 0.01 | 0.05 ± 0.03 | 0.00 ± 0.01 |
| C9Z0Z3 | SCAB_55741 <sup>d</sup> | Carboxy-terminal processing protease       | 0.22 ± 0.06 | 0.08 ± 0.04 | nd          | 0.02 ± 0.03 | nd          | nd          |
| C9Z2Q2 | SCAB_57371              | Secreted chitin binding protein            | nd          | 0.39 ± 0.23 | 0.38 ± 0.13 | 0.05 ± 0.05 | 0.41 ± 0.12 | 0.28 ± 0.16 |
| C9Z473 | SCAB_57981              | Protein DesF, iron transport system        | 0.13 ± 0.12 | 0.19 ± 0.16 | 0.06 ± 0.06 | 0.05 ± 0.03 | 0.16 ± 0.08 | 0.10 ± 0.09 |
| C9Z487 | SCAB_58141              | Integrin-like protein                      | 0.10 ± 0.09 | nd          | nd          | 0.04 ± 0.04 | nd          | nd          |
| C9Z5T6 | SCAB_58971              | Chorismate mutase                          | 0.01 ± 0.03 | 0.01 ± 0.03 | nd          | 0.04 ± 0.04 | nd          | nd          |
| C9Z5W7 | SCAB_59301              | Sortase-sorted protein                     | 0.09 ± 0.09 | 0.08 ± 0.02 | 0.01 ± 0.02 | nd          | 0.00 ± 0.01 | nd          |
| C9Z7C3 | SCAB_59681              | Secreted peptidase                         | nd          | 0.01 ± 0.01 | nd          | nd          | 0.01 ± 0.02 | 0.03 ± 0.02 |
| C9Z7C8 | SCAB_59731 <sup>d</sup> | Superoxide dismutase                       | 0.08 ± 0.11 | 0.17 ± 0.11 | 0.15 ± 0.10 | 0.01 ± 0.02 | 0.20 ± 0.20 | 0.22 ± 0.16 |
| C9Z7D6 | SCAB_59811              | Membrane protein                           | nd          | 0.12 ± 0.12 | nd          | nd          | 0.01 ± 0.02 | nd          |
| C9ZAQ3 | SCAB_61791              | Uncharacterized protein                    | 0.11 ± 0.09 | nd          | nd          | 0.02 ± 0.02 | nd          | nd          |
| C9ZAT6 | SCAB_62141 <sup>d</sup> | Pyruvate phosphate dikinase                | 0.01 ± 0.01 | 0.01 ± 0.01 | nd          | 0.00 ± 0.01 | nd          | nd          |

(+22)

|        |                         |                                                                     |             |             |             |             |             |             |
|--------|-------------------------|---------------------------------------------------------------------|-------------|-------------|-------------|-------------|-------------|-------------|
| C9ZDY2 | SCAB_64081              | Secreted protein                                                    | 0.66 ± 0.41 | 1.77 ± 0.40 | 1.13 ± 0.15 | 0.91 ± 0.18 | 0.74 ± 0.36 | 0.79 ± 0.20 |
| C9ZE07 | SCAB_64331 <sup>d</sup> | TerD-like stress protein                                            | 0.17 ± 0.15 | 0.17 ± 0.12 | 0.18 ± 0.06 | 0.33 ± 0.08 | 0.30 ± 0.17 | 0.33 ± 0.16 |
| C9ZE08 | SCAB_64341 <sup>d</sup> | TerD-like stress protein                                            | 0.10 ± 0.10 | 0.15 ± 0.05 | 0.20 ± 0.00 | 0.30 ± 0.00 | 0.43 ± 0.07 | 0.58 ± 0.24 |
| C9ZE18 | SCAB_64451              | Hypothetical protein                                                | 0.40 ± 0.32 | 0.08 ± 0.04 | 0.03 ± 0.04 | 0.07 ± 0.04 | 0.00 ± 0.01 | nd          |
| C9ZFN9 | SCAB_65271 <sup>d</sup> | Uncharacterized protein                                             | 0.12 ± 0.21 | 0.21 ± 0.14 | 0.02 ± 0.04 | 0.24 ± 0.04 | 0.02 ± 0.06 | nd          |
| C9ZHF3 | SCAB_66761              | Secreted protein                                                    | 1.10 ± 0.04 | 0.42 ± 0.11 | 0.42 ± 0.10 | 0.26 ± 0.07 | 0.07 ± 0.03 | 0.05 ± 0.03 |
| C9YTR7 | SCAB_67061 <sup>d</sup> | Dihydrolipoyl dehydrogenase                                         | 0.46 ± 0.43 | 0.59 ± 0.37 | 0.95 ± 0.15 | 0.54 ± 0.10 | 1.37 ± 0.43 | 1.63 ± 0.12 |
| C9YTV5 | SCAB_67441              | Secreted protein                                                    | 0.09 ± 0.06 | 0.22 ± 0.11 | 0.11 ± 0.06 | 0.12 ± 0.11 | 0.01 ± 0.03 | 0.00 ± 0.01 |
| C9YTX5 | SCAB_67651              | Secreted protein                                                    | 0.05 ± 0.05 | 0.02 ± 0.03 | nd          | 0.02 ± 0.02 | nd          | nd          |
| C9YWP0 | SCAB_68931              | Branched-chain amino acid ABC transporter substrate-binding protein | 0.55 ± 0.23 | 1.95 ± 0.47 | 1.13 ± 0.15 | 0.67 ± 0.19 | 1.10 ± 0.39 | 1.02 ± 0.21 |
| C9YWP7 | SCAB_69011              | Lytic transglycosylase                                              | 0.20 ± 0.13 | 0.20 ± 0.09 | 0.13 ± 0.10 | 0.13 ± 0.02 | 0.04 ± 0.05 | 0.02 ± 0.02 |
| C9YWU0 | SCAB_69441 <sup>d</sup> | Stress-induced protein                                              | 0.02 ± 0.03 | nd          | nd          | 0.02 ± 0.03 | nd          | nd          |
| C9YY62 | SCAB_69701 <sup>d</sup> | Glyceraldehyde-3-phosphate dehydrogenase                            | 0.01 ± 0.02 | nd          | nd          | nd          | 0.07 ± 0.06 | 0.11 ± 0.06 |
| (+5)   |                         |                                                                     |             |             |             |             |             |             |
| C9YZU4 | SCAB_71211              | ssp-like secreted protease                                          | 0.09 ± 0.02 | 0.04 ± 0.04 | nd          | 0.16 ± 0.06 | nd          | nd          |
| C9Z2V8 | SCAB_72781              | Penicillin acylase                                                  | 0.04 ± 0.06 | 0.39 ± 0.15 | 0.26 ± 0.07 | 0.13 ± 0.05 | 0.23 ± 0.07 | 0.20 ± 0.11 |
| C9Z4D5 | SCAB_73521              | Peptidyl-prolyl cis-trans isomerase                                 | 0.02 ± 0.03 | 0.11 ± 0.09 | 0.05 ± 0.06 | 0.04 ± 0.04 | 0.01 ± 0.02 | nd          |
| C9Z4K8 | SCAB_74261              | Secreted protein                                                    | 0.46 ± 0.05 | 0.78 ± 0.14 | 0.64 ± 0.07 | 0.02 ± 0.03 | nd          | nd          |
| C9Z7Q2 | SCAB_75761              | Chitinase/cellulase                                                 | 0.01 ± 0.01 | 0.03 ± 0.01 | 0.02 ± 0.03 | 0.01 ± 0.01 | 0.08 ± 0.06 | 0.06 ± 0.04 |
| C9Z9C8 | SCAB_76271 <sup>d</sup> | Uncharacterized protein                                             | 0.02 ± 0.03 | 0.72 ± 0.63 | 0.95 ± 0.35 | 0.19 ± 0.15 | 0.11 ± 0.06 | 0.03 ± 0.04 |
| C9Z9G7 | SCAB_76661              | Lipoprotein                                                         | 0.16 ± 0.09 | 0.66 ± 0.19 | 0.33 ± 0.15 | 0.12 ± 0.08 | 0.02 ± 0.05 | nd          |
| C9ZEA9 | SCAB_79401              | Xylanase A                                                          | nd          | 0.10 ± 0.05 | 0.05 ± 0.05 | nd          | 0.05 ± 0.06 | 0.04 ± 0.05 |
| C9ZEC5 | SCAB_79561              | Secreted glycosyl hydrolase                                         | nd          | 0.37 ± 0.16 | 0.24 ± 0.11 | nd          | 0.14 ± 0.13 | 0.15 ± 0.12 |
| C9ZHS9 | SCAB_81661 <sup>d</sup> | TerD-like stress protein                                            | 0.28 ± 0.30 | 0.53 ± 0.15 | 0.57 ± 0.10 | 0.55 ± 0.05 | 0.77 ± 0.27 | 0.94 ± 0.44 |

|        |            |                                                           |             |             |             |             |             |             |
|--------|------------|-----------------------------------------------------------|-------------|-------------|-------------|-------------|-------------|-------------|
| C9YU10 | SCAB_81831 | Serine-threonine protein kinase                           | 0.01 ± 0.01 | 0.08 ± 0.05 | 0.03 ± 0.04 | 0.01 ± 0.02 | nd          | nd          |
| C9YU17 | SCAB_81901 | Peptide/nickel transport system substrate-binding protein | nd          | 0.53 ± 0.30 | 0.47 ± 0.16 | 0.05 ± 0.09 | 0.00 ± 0.01 | nd          |
| C9YWW7 | SCAB_82691 | Endonuclease/exonuclease/phosphatase family protein       | nd          | 0.01 ± 0.02 | 0.08 ± 0.07 | 0.06 ± 0.03 | nd          | nd          |
| C9YWW9 | SCAB_82711 | Uncharacterized protein                                   | 0.04 ± 0.01 | 0.10 ± 0.03 | 0.06 ± 0.02 | 0.03 ± 0.00 | 0.03 ± 0.01 | 0.03 ± 0.01 |
| C9Z058 | SCAB_84971 | Uncharacterized protein                                   | 0.03 ± 0.03 | 0.07 ± 0.01 | 0.08 ± 0.02 | 0.06 ± 0.01 | 0.08 ± 0.06 | 0.12 ± 0.05 |
| C9Z064 | SCAB_85031 | Secreted protein                                          | 0.06 ± 0.10 | nd          | nd          | nd          | 0.09 ± 0.09 | 0.12 ± 0.07 |
| C9Z800 | SCAB_89701 | Secreted subtilisin-like protease                         | nd          | 0.03 ± 0.02 | 0.01 ± 0.01 | 0.10 ± 0.03 | 0.02 ± 0.02 | 0.04 ± 0.02 |
| C9Z813 | SCAB_89831 | Secreted protein                                          | 0.23 ± 0.14 | 0.70 ± 0.15 | 0.62 ± 0.15 | 0.11 ± 0.05 | nd          | nd          |
| C9Z823 | SCAB_89921 | Secreted protein                                          | 0.06 ± 0.02 | 0.21 ± 0.05 | 0.14 ± 0.05 | 0.07 ± 0.03 | nd          | nd          |
| C9Z9T4 | SCAB_90811 | Secreted protein                                          | 0.21 ± 0.21 | 1.09 ± 0.28 | 1.03 ± 0.37 | 0.33 ± 0.15 | 0.68 ± 0.22 | 0.41 ± 0.11 |
| C9Z9U4 | SCAB_90901 | Secreted protein                                          | 0.08 ± 0.14 | 0.81 ± 0.34 | 0.53 ± 0.17 | 0.25 ± 0.08 | 0.40 ± 0.41 | 0.24 ± 0.15 |

<sup>a</sup> Uniprot accession number; <sup>b</sup> Data are the mean of three replicates; <sup>c</sup> nd: not detected; <sup>d</sup> Protein with intracellular localization prediction.
