# Supplementary material for: Comparative secretome analysis of Streptomyces scabiei during growth in the presence or absence of potato suberin
Source: PubMed Central journal article supplement (PMC4098958; doi:10.1186/1477-5956-12-35), 2014-06-25
Supplement: 1477-5956-12-35-S2.pdf [file 1477-5956-12-35-S2.pdf]

**Additional file 2: Table S2. Proteins specifically produced by *Streptomyces scabiei* in casein medium**

| Protein designation <sup>a</sup>                            | Gene designation        | Putative function                             | Abundance (spectrum count/MW <sup>b</sup> ) |                 |             |
|-------------------------------------------------------------|-------------------------|-----------------------------------------------|---------------------------------------------|-----------------|-------------|
|                                                             |                         |                                               | Day 1                                       | Day 3           | Day 5       |
| Translational, ribosomal structure and biogenesis           |                         |                                               |                                             |                 |             |
| C9Z3N9                                                      | SCAB_26011 <sup>d</sup> | Elongation factor Ts                          | 0.04 ± 0.08                                 | nd <sup>c</sup> | nd          |
| C9YW93                                                      | SCAB_37101 <sup>d</sup> | Elongation factor G2                          | 0.06 ± 0.07                                 | nd              | nd          |
| Transcription                                               |                         |                                               |                                             |                 |             |
| C9Z8G3                                                      | SCAB_28911              | Putative transcriptional regulator            | 0.04 ± 0.01                                 | nd              | nd          |
| C9ZHT2                                                      | SCAB_81701              | Putative transcriptional regulator            | 0.04 ± 0.06                                 | nd              | nd          |
| Posttranslational modification, protein turnover, chaperone |                         |                                               |                                             |                 |             |
| C9Z0K0                                                      | SCAB_24411              | Serine protease                               | 0.02 ± 0.04                                 | 0.35 ± 0.08     | 0.19 ± 0.19 |
| C9ZBR8                                                      | SCAB_30731              | Glutaredoxin-like protein                     | nd                                          | 0.13 ± 0.22     | 0.13 ± 0.13 |
| C9YUY4                                                      | SCAB_36291 <sup>d</sup> | Chaperonin GroEL (HSP60 family)               | 0.06 ± 0.07                                 | nd              | nd          |
| C9ZC44                                                      | SCAB_46811              | Protease                                      | 0.06 ± 0.02                                 | nd              | nd          |
| C9ZDR4                                                      | SCAB_47841              | Lipoprotein                                   | 0.05 ± 0.04                                 | 0.77 ± 0.30     | 0.24 ± 0.12 |
| C9ZH64                                                      | SCAB_50441 <sup>d</sup> | Chaperonin GroEL (HSP60 family)               | 0.23 ± 0.25                                 | nd              | nd          |
| C9ZHH5                                                      | SCAB_66981 <sup>d</sup> | Serine protease                               | nd                                          | 0.13 ± 0.08     | 0.01 ± 0.01 |
| C9YVE7                                                      | SCAB_68221              | DSBA oxidoreductase                           | 0.14 ± 0.18                                 | 0.72 ± 0.18     | 0.09 ± 0.09 |
| C9YVH7                                                      | SCAB_68521              | DSBA-like thioredoxin domain protein          | nd                                          | 0.06 ± 0.08     | nd          |
| C9Z4H4                                                      | SCAB_73921              | Serine protease                               | 0.02 ± 0.04                                 | nd              | nd          |
| C9Z651                                                      | SCAB_74981              | Peptidyl-prolyl cis-trans isomerase           | 0.01 ± 0.02                                 | 0.03 ± 0.03     | nd          |
| Cell wall/membrane/envelope biogenesis                      |                         |                                               |                                             |                 |             |
| C9Z0D2                                                      | SCAB_8831 <sup>d</sup>  | Polypeptide N-acetylgalactosaminyltransferase | nd                                          | 0.05 ± 0.04     | 0.01 ± 0.01 |
| C9Z3C9                                                      | SCAB_10101              | Penicillin binding protein                    | 0.02 ± 0.04                                 | nd              | nd          |
| C9Z544                                                      | SCAB_11801              | Peptidase                                     | 0.03 ± 0.04                                 | 0.09 ± 0.05     | 0.05 ± 0.07 |
| C9Z0I6                                                      | SCAB_24251              | Peptidase                                     | 0.37 ± 0.00                                 | 0.36 ± 0.02     | 0.22 ± 0.06 |
| C9YTE7                                                      | SCAB_35531              | D-alanyl-D-alanine carboxypeptidase           | 0.01 ± 0.02                                 | nd              | nd          |
| C9YUU8                                                      | SCAB_35931              | Glycoside hydrolase                           | 0.05 ± 0.07                                 | 0.03 ± 0.03     | nd          |

|                                  |                         |                                                      |             |             |             |
|----------------------------------|-------------------------|------------------------------------------------------|-------------|-------------|-------------|
| C9YUV0                           | SCAB_35951              | NlpC/P60 family protein                              | 0.11 ± 0.05 | nd          | nd          |
| C9YXW3                           | SCAB_38101              | NLP/P60 family protein                               | 0.08 ± 0.02 | 0.20 ± 0.07 | 0.09 ± 0.07 |
| C9Z3V9                           | SCAB_41401              | Penicillin-binding transpeptidase/transglycosylase   | 0.10 ± 0.08 | nd          | nd          |
| C9ZAI2                           | SCAB_45551              | Penicillin-binding protein                           | 0.04 ± 0.06 | 0.01 ± 0.02 | nd          |
| C9ZFJ2                           | SCAB_49281              | Transglycosylase                                     | nd          | 0.09 ± 0.04 | 0.01 ± 0.02 |
| C9Z7G0                           | SCAB_60031 <sup>d</sup> | Rod shape-determining protein                        | 0.05 ± 0.05 | nd          | nd          |
| C9ZFR2                           | SCAB_65501              | Cell wall glycoprotein hydrolase                     | 0.19 ± 0.09 | 0.02 ± 0.03 | nd          |
| C9YZN6                           | SCAB_70631              | Penicillin binding protein                           | 0.03 ± 0.05 | nd          | nd          |
| Signal transduction mechanism    |                         |                                                      |             |             |             |
| C9ZBP9                           | SCAB_30521              | Protein containing a PDZ domain                      | 0.05 ± 0.07 | nd          | nd          |
| C9ZAH5                           | SCAB_45471 <sup>d</sup> | Forkhead-associated protein                          | 0.03 ± 0.03 | 0.08 ± 0.05 | 0.07 ± 0.06 |
| C9YZK1                           | SCAB_55281 <sup>d</sup> | Two-component system response regulator              | 0.05 ± 0.09 | nd          | nd          |
| Secretion                        |                         |                                                      |             |             |             |
| C9YVQ1                           | SCAB_6041               | SecDF protein-export membrane protein                | 0.04 ± 0.05 | 0.19 ± 0.08 | 0.07 ± 0.01 |
| C9ZH73                           | SCAB_50531              | Preprotein translocase subunit SecD                  | 0.06 ± 0.10 | 0.33 ± 0.05 | 0.08 ± 0.07 |
| C9Z645                           | SCAB_74911              | Protein translocase subunit SecD                     | 0.03 ± 0.00 | 0.30 ± 0.16 | 0.10 ± 0.07 |
| Defense mechanisms and virulence |                         |                                                      |             |             |             |
| C9YTG5                           | SCAB_50691              | Necrosis inducing protein                            | nd          | 0.05 ± 0.04 | 0.04 ± 0.06 |
| C9ZB10                           | SCAB_77321              | Tomatinase                                           | 0.04 ± 0.04 | nd          | nd          |
| C9ZAY5                           | SCAB_77602              | Virulence factor nec1                                | 0.11 ± 0.10 | nd          | nd          |
| Differentiation                  |                         |                                                      |             |             |             |
| C9Z3A4                           | SCAB_86841              | Spore-associated protein                             | 0.12 ± 0.04 | 0.14 ± 0.07 | 0.10 ± 0.08 |
| Energy production and conversion |                         |                                                      |             |             |             |
| C9ZGR4                           | SCAB_34111 <sup>d</sup> | Phosphoenolpyruvate carboxykinase (GTP)              | 0.04 ± 0.04 | nd          | nd          |
| C9YTR6                           | SCAB_67051 <sup>d</sup> | Dihydrolipoyllysine-residue succinyltransferase      | 0.06 ± 0.08 | nd          | nd          |
| C9YTU0                           | SCAB_67291              | Heme/copper-type cytochrome/quinol oxidase subunit 2 | 0.13 ± 0.12 | 0.44 ± 0.17 | 0.23 ± 0.11 |
| C9YTU6                           | SCAB_67351              | Cytochrome c. mono- and diheme variant               | 0.10 ± 0.04 | 0.17 ± 0.07 | 0.06 ± 0.05 |
| Lipid metabolism                 |                         |                                                      |             |             |             |
| C9Z1G4                           | SCAB_72401              | Lipase                                               | 0.02 ± 0.04 | 0.04 ± 0.06 | 0.05 ± 0.09 |
| Carbohydrate metabolism          |                         |                                                      |             |             |             |
| C9ZGB6                           | SCAB_3481               | Levanase                                             | nd          | 0.01 ± 0.01 | nd          |

|                                  |                         |                                                       |             |             |             |
|----------------------------------|-------------------------|-------------------------------------------------------|-------------|-------------|-------------|
| C9Z5F4                           | SCAB_42381              | Lipoprotein transport system associated               | 0.02 ± 0.03 | 0.06 ± 0.04 | 0.02 ± 0.03 |
| C9Z5U5                           | SCAB_59071              | β-mannanase                                           | 0.03 ± 0.04 | nd          | nd          |
| C9ZHD5                           | SCAB_66581              | Maltose-binding protein                               | 0.08 ± 0.09 | 0.01 ± 0.01 | nd          |
| C9ZB14                           | SCAB_77361              | Substrate-binding protein transport system associated | nd          | 0.08 ± 0.07 | 0.01 ± 0.01 |
| Amino acid metabolism            |                         |                                                       |             |             |             |
| C9Z0B6                           | SCAB_8661               | Protease                                              | 0.09 ± 0.02 | 0.06 ± 0.03 | 0.03 ± 0.03 |
| C9Z6L9                           | SCAB_12481              | Substrate-binding protein transport system associated | nd          | 0.09 ± 0.03 | 0.01 ± 0.02 |
| C9Z0M7                           | SCAB_24711              | V8-like Glu-specific endopeptidase                    | 0.20 ± 0.13 | 0.08 ± 0.01 | 0.02 ± 0.03 |
| C9ZA98                           | SCAB_29881              | Amino acid ABC transporter solute-binding protein     | 0.09 ± 0.16 | 0.30 ± 0.18 | 0.01 ± 0.02 |
| C9ZBT4                           | SCAB_30901              | Peptidase                                             | 0.03 ± 0.04 | 0.04 ± 0.04 | nd          |
| C9ZBY7                           | SCAB_31431              | Transport system peptide-binding protein              | nd          | 0.07 ± 0.06 | nd          |
| C9YUX1                           | SCAB_36161 <sup>d</sup> | Ser/Thr protein kinase                                | 0.04 ± 0.01 | 0.14 ± 0.03 | 0.08 ± 0.03 |
| C9Y TZ8                          | SCAB_67881 <sup>d</sup> | Transglutaminase-like enzyme                          | 0.02 ± 0.04 | 0.12 ± 0.08 | 0.01 ± 0.01 |
| C9Z1B0                           | SCAB_71831              | Alanine dehydrogenase                                 | 0.06 ± 0.10 | nd          | nd          |
| C9Z311                           | SCAB_73351              | Oligopeptide-binding lipoprotein                      | 0.02 ± 0.03 | 0.13 ± 0.08 | nd          |
| C9Z312                           | SCAB_73361              | Substrate-binding lipoprotein                         | 0.12 ± 0.13 | 0.08 ± 0.03 | 0.01 ± 0.01 |
| C9Z317                           | SCAB_73411              | Succinylglutamate desuccinylase                       | 0.05 ± 0.05 | 0.08 ± 0.03 | nd          |
| C9Z9F7                           | SCAB_76561              | Solute binding transport lipoprotein                  | 0.09 ± 0.14 | 0.17 ± 0.08 | 0.01 ± 0.02 |
| C9Z9K4                           | SCAB_89971              | Glutamate uptake system binding subunit               | 0.03 ± 0.03 | 0.41 ± 0.07 | 0.29 ± 0.20 |
| Coenzyme metabolism              |                         |                                                       |             |             |             |
| C9YZJ1                           | SCAB_55181 <sup>d</sup> | Adenosylhomocysteinase                                | 0.04 ± 0.05 | nd          | nd          |
| Nucleotide metabolism            |                         |                                                       |             |             |             |
| C9YUT1                           | SCAB_35741 <sup>d</sup> | Bifunctional purine biosynthesis protein PurH         | 0.01 ± 0.02 | nd          | nd          |
| Inorganic ion metabolism         |                         |                                                       |             |             |             |
| C9Z1Z0                           | SCAB_9831               | Iron transport lipoprotein                            | 0.02 ± 0.03 | nd          | nd          |
| C9ZDM4                           | SCAB_47441              | Copper export protein                                 | 0.01 ± 0.02 | 0.05 ± 0.01 | 0.00 ± 0.01 |
| C9ZAS1                           | SCAB_61981              | ABC-transporter metal-binding lipoprotein             | 0.33 ± 0.16 | 0.26 ± 0.18 | 0.05 ± 0.04 |
| General function prediction only |                         |                                                       |             |             |             |
| C9Z0A5                           | SCAB_8551               | Serine/threonine protein kinase                       | nd          | 0.02 ± 0.04 | nd          |
| C9Z521                           | SCAB_11571 <sup>d</sup> | Peptidase                                             | nd          | 0.25 ± 0.17 | nd          |
| C9YUX2                           | SCAB_36171              | Serine/threonine protein kinase                       | 0.05 ± 0.02 | 0.02 ± 0.02 | nd          |

|                  |                         |                                 |             |             |             |
|------------------|-------------------------|---------------------------------|-------------|-------------|-------------|
| C9YZF2           | SCAB_54781              | Peptidase                       | nd          | 0.01 ± 0.03 | nd          |
| C9YZL5           | SCAB_55431              | Serine/threonine protein kinase | 0.01 ± 0.01 | 0.07 ± 0.05 | nd          |
| C9Z2K0           | SCAB_56851              | SGNH_hydrolase protein          | 0.12 ± 0.21 | nd          | nd          |
| C9Z464           | SCAB_57891              | Phosphoesterase                 | 0.05 ± 0.07 | 0.01 ± 0.02 | nd          |
| C9YTY1           | SCAB_67711 <sup>d</sup> | Serine/threonine protein kinase | nd          | 0.02 ± 0.03 | nd          |
| C9Z7K6           | SCAB_75261 <sup>d</sup> | Integration host factor         | nd          | 0.08 ± 0.14 | nd          |
| Unknown function |                         |                                 |             |             |             |
| C9ZEK6           | SCAB_2511               |                                 | 0.17 ± 0.18 | 0.31 ± 0.04 | 0.14 ± 0.07 |
| C9ZEN8           | SCAB_2861               |                                 | 0.02 ± 0.04 | 0.30 ± 0.06 | 0.16 ± 0.08 |
| C9YVP6           | SCAB_5991               |                                 | 0.04 ± 0.07 | 0.15 ± 0.20 | 0.08 ± 0.07 |
| C9Z898           | SCAB_13691              |                                 | 0.15 ± 0.17 | 0.01 ± 0.02 | nd          |
| C9YVV1           | SCAB_20751              |                                 | 0.07 ± 0.07 | 0.04 ± 0.00 | nd          |
| C9YVV3           | SCAB_20771              |                                 | nd          | 0.04 ± 0.04 | nd          |
| C9Z3M9           | SCAB_25911              |                                 | 0.03 ± 0.04 | 0.18 ± 0.06 | 0.03 ± 0.04 |
| C9Z704           | SCAB_28451              |                                 | 0.03 ± 0.05 | 0.28 ± 0.05 | 0.31 ± 0.17 |
| C9ZGR1           | SCAB_34081              |                                 | 0.01 ± 0.01 | 0.10 ± 0.06 | 0.05 ± 0.01 |
| C9YTG1           | SCAB_35671              |                                 | 0.03 ± 0.05 | 0.26 ± 0.16 | 0.25 ± 0.11 |
| C9YW48           | SCAB_36641              |                                 | 0.20 ± 0.24 | 0.12 ± 0.02 | 0.06 ± 0.00 |
| C9YW90           | SCAB_37071              |                                 | nd          | 0.03 ± 0.05 | 0.03 ± 0.05 |
| C9YZA7           | SCAB_38891              |                                 | nd          | 0.04 ± 0.04 | nd          |
| C9YZB8           | SCAB_39011              |                                 | 0.11 ± 0.06 | 0.20 ± 0.05 | 0.06 ± 0.04 |
| C9Z0P4           | SCAB_39271              |                                 |             | 0.22 ± 0.10 | 0.36 ± 0.05 |
| C9Z0Q5           | SCAB_39381              |                                 | 0.02 ± 0.04 | 0.10 ± 0.02 | 0.06 ± 0.06 |
| C9Z3W8           | SCAB_41491 <sup>d</sup> |                                 | 0.01 ± 0.03 | nd          | nd          |
| C9Z5J2           | SCAB_42771              |                                 | 0.76 ± 0.72 | nd          | 0.02 ± 0.03 |
| C9Z7A3           | SCAB_44341              |                                 | nd          | 0.06 ± 0.03 | 0.03 ± 0.05 |
| C9Z8P6           | SCAB_44591              |                                 | nd          | 0.12 ± 0.10 | 0.01 ± 0.02 |
| C9ZAI3           | SCAB_45561              |                                 | nd          | 0.07 ± 0.03 | 0.03 ± 0.04 |
| C9ZAJ6           | SCAB_45691              |                                 | 0.01 ± 0.02 | 0.03 ± 0.03 | nd          |
| C9ZC26           | SCAB_46621              |                                 | 0.13 ± 0.08 | 0.64 ± 0.17 | 0.24 ± 0.08 |
| C9ZC73           | SCAB_47121              |                                 | 0.05 ± 0.09 | 0.07 ± 0.03 | 0.04 ± 0.03 |

|        |                         |             |             |             |
|--------|-------------------------|-------------|-------------|-------------|
| C9ZDS2 | SCAB_47931              | 0.06 ± 0.04 | 0.01 ± 0.01 | nd          |
| C9ZH28 | SCAB_50061              | 0.13 ± 0.04 | 0.19 ± 0.07 | 0.01 ± 0.03 |
| C9YTI5 | SCAB_50911              | 0.07 ± 0.13 | 0.07 ± 0.06 | 0.02 ± 0.04 |
| C9YTJ9 | SCAB_51051              | 0.04 ± 0.04 | 0.08 ± 0.03 | 0.03 ± 0.03 |
| C9YV42 | SCAB_52011              | 0.13 ± 0.19 | 0.36 ± 0.24 | 0.17 ± 0.09 |
| C9YXY9 | SCAB_53921              | 0.05 ± 0.02 | 0.00 ± 0.01 | nd          |
| C9YZE8 | SCAB_54741              | 0.02 ± 0.03 | 0.13 ± 0.04 | 0.09 ± 0.02 |
| C9YZI3 | SCAB_55101              | 0.03 ± 0.05 | 0.04 ± 0.02 | 0.01 ± 0.01 |
| C9YZK3 | SCAB_55301              | 0.06 ± 0.07 | 0.14 ± 0.08 | 0.03 ± 0.02 |
| C9Z7B9 | SCAB_59641              | nd          | 0.15 ± 0.16 | 0.09 ± 0.03 |
| C9ZE17 | SCAB_64441              | 0.03 ± 0.04 | nd          | nd          |
| C9ZFR7 | SCAB_65551 <sup>d</sup> | nd          | 0.13 ± 0.10 | nd          |
| C9ZHF7 | SCAB_66801              | 0.09 ± 0.04 | 0.59 ± 0.31 | 0.32 ± 0.22 |
| C9YTT6 | SCAB_67251              | 0.02 ± 0.02 | 0.23 ± 0.12 | 0.10 ± 0.06 |
| C9YYF1 | SCAB_70601              | 0.02 ± 0.04 | 0.13 ± 0.03 | 0.01 ± 0.02 |
| C9Z4L1 | SCAB_74291              | 0.07 ± 0.06 | 0.21 ± 0.07 | 0.02 ± 0.04 |
| C9ZCN2 | SCAB_78561              | 0.05 ± 0.07 | nd          | nd          |
| C9ZCQ1 | SCAB_78761 <sup>d</sup> | 0.11 ± 0.15 | nd          | nd          |
| C9YU74 | SCAB_82491              | nd          | 0.14 ± 0.05 | 0.04 ± 0.04 |
| C9Z4V5 | SCAB_87971 <sup>d</sup> | 0.05 ± 0.01 | 0.14 ± 0.06 | 0.04 ± 0.02 |
| C9Z687 | SCAB_88211              | nd          | 0.33 ± 0.31 | 0.29 ± 0.13 |
| C9Z7Y9 | SCAB_89571              | nd          | 0.08 ± 0.08 | 0.03 ± 0.05 |
| C9Z801 | SCAB_89711              | nd          | 0.09 ± 0.04 | 0.06 ± 0.05 |

<sup>a</sup> Uniprot accession number; <sup>b</sup> Data are the mean of three replicates; <sup>c</sup> nd: not detected; <sup>d</sup> Protein with intracellular localisation prediction.
