# Supplementary material for: Comparative secretome analysis of Streptomyces scabiei during growth in the presence or absence of potato suberin
Source: PubMed Central journal article supplement (PMC4098958; doi:10.1186/1477-5956-12-35), 2014-06-25
Supplement: 1477-5956-12-35-S3.pdf [file 1477-5956-12-35-S3.pdf]

**Additional file 3: Table S3.** Primers used in this study for real-time RT-PCR.

| <b>Gene assignment</b> | <b>Putative function</b>                                | <b>Primers sets (5'-3')</b>                                     |
|------------------------|---------------------------------------------------------|-----------------------------------------------------------------|
| SCAB_3891              | $\alpha$ -galactosidase                                 | For- CAGCAGATCGCGCAGTT<br>Rev-GTGGAAAGCTGTTGGGATTGA             |
| SCAB_6001              | Feruloyl esterase                                       | For-GCGGCAAGAACCGGAGCTTCATCCT<br>Rev-AGTGGAAACCCGAACACCACCCGGTA |
| SCAB_51091             | Esterase-lipase                                         | For-TCCTGCCGTACATCAACACGATCA<br>Rev-AAGTAGTTGATCTTCTTCGCGCCG    |
| SCAB_57301             | 3-oxo-5.6-dehydrosuberyl-CoA semialdehyde dehydrogenase | For-CGTGAACCTCGGCGTGAAGTG<br>Rev-GAGTTCAGCACGTCCTGGGAGTA        |
| SCAB_70541             | Lipolytic enzyme                                        | For-GTTCGGGCACAACGACTCCAAG<br>Rev-CGTCCAGGTAGCGGAGCAGAT         |
| SCAB_74351             | Glycerophosphoryl diester phosphodiesterase             | For-AACACCTTCCTGCCCCGGAACCTCC<br>Rev-AGTACACCTTGAACGCGCCGAACGC  |
| SCAB_78851             | Sphingolipid ceramide N-deacylase                       | For-TGCTCGATCTACCCGTTCAAGGAA<br>Rev-TGTCGATGTAGTCTGAAGGTCGT     |
| SCAB_79261             | Feruloyl esterase                                       | For-GGCAAGAGCCGCAGCTTCATCCTCA<br>Rev-CAGTGGAAAGGCGAAGATCAGCCGGT |
| SCAB_24291             | Gyrase A ( <i>gyrA</i> )                                | For-GGACATCCAGACGCAGTACA<br>Rev-CTCGGTGTTGAGCTTCTCCT            |
